# Supplementary material
Source: PubMed Central journal article supplement (PMC8454604)
Supplement: mmc1.pdf [file mmc1.pdf]

XINN, Volume ■ ■

## **Supplemental Information**

### **Modeling the Epidemic Trend of the 2019 Novel Coronavirus Outbreak in China**

**Mingwang Shen, Zhihang Peng, Yanni Xiao, and Lei Zhang**

## Supplementary Appendix:

This is a supplementary document describing mathematical modelling details presented in the main text and parameters estimation.

### 1. Model formulation

We proposed a dynamic compartmental model to describe the transmission of COVID-19 in Hubei province, China. The population is divided into six compartments (**Figure S1**): susceptible individuals ( $S$ ), asymptomatic (but infectious) individuals during the incubation period ( $E$ ), undiagnosed infectious individuals with symptoms ( $I$ ), diagnosed individuals with isolation and treatment ( $T$ ), recovered ( $R$ ) and dead ( $D$ ) individuals. The total population size is denoted by  $N$ , where  $N=S+E+I+T+R$ .

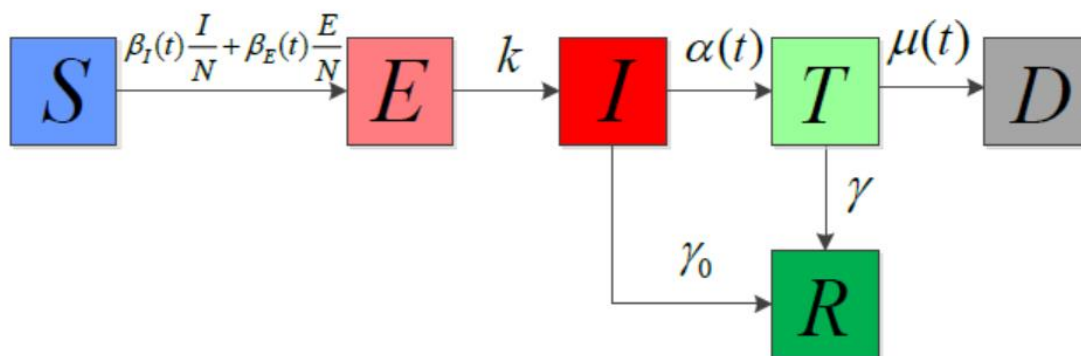

**Figure S1.** A schematic flow diagram of the transmission of COVID-19.

Susceptible individuals become infected by contacts with latent ( $E$ ) and undiagnosed infectious individuals with symptoms ( $I$ ) in the public space (e.g. public transportations, supermarkets, offices, etc) and household (home or other private space). The overall rate of infection (total new infections) is given by the sum of rates of infections via these routes. That is,

$$\Lambda_{total} = \Lambda_{pub} + \Lambda_{pri}. \quad (1)$$

For each of route of transmission,

- (a) public contacts

$$\Lambda_{pub} = \beta_E^{pub}(t) \frac{(S - S_f)E}{N - N_f} + \beta_I^{pub}(t) \frac{(S - S_f)I}{N - N_f}, \quad (2)$$

(b) household contacts

$$\Lambda_{pri} = \beta_E^{pri}(t) \frac{S_f E}{N_f} + \beta_I^{pri}(t) \frac{S_f I}{N_f}. \quad (3)$$

26

27 where

$$\begin{aligned} \beta_I^{pub}(t) &= \beta m_1(t)(1 - \theta p_1(t)), \beta_E^{pub}(t) = (1 - \varepsilon)\beta_I^{pub}(t), \\ \beta_I^{pri}(t) &= \beta m_2(t)(1 - \theta p_2), \beta_E^{pri}(t) = (1 - \varepsilon)\beta_I^{pri}(t). \end{aligned} \quad (4)$$

30 Here  $\beta$  denotes the probability of transmission per contact with the infectious individuals  
 31 with symptoms. We assumed that for contacts with the latent individuals this probability is  
 32 lower, i.e.  $(1 - \varepsilon)\beta$  where  $0 \leq \varepsilon \leq 1$  denotes the reduction in per-act transmission  
 33 probability. The parameters  $m_1(t)$  and  $m_2(t)$  represent the average number of daily person-to-  
 34 person contacts in the public space and household,  $p_1(t)$  and  $p_2$  denote the proportion of mask  
 35 usage in the public space and household, respectively, and  $\theta$  is the effectiveness of face  
 36 mask/respirators in infection prevention.

### 37 Estimation of the population size and number of susceptibles for each route of transmission

38 For household contacts, the overall population size ( $N_f$ ) is estimated as the total number of  
 39 households members that are at risk of COVID-19 infection, whereas the number of  
 40 susceptible households members ( $S_f$ ) is the difference between  $N_f$  and the number of infected  
 41 individuals in these households. We assumed that the number of the households at risk of  
 42 infection is the same as the number of individuals infected in public space because the  
 43 probability of two or more household members being infected at the same time but at  
 44 different public venues is very small. Hence, the entry of  $N_f$  is  $r\Lambda_{pub}$ , where  $r$  is the average  
 45 number of household members in a Chinese family and  $\Lambda_{pub}$  is the number of individuals  
 46 infected in public space as shown in eq. (2). We assumed that the infected family members  
 47 become recovered after the mean period  $1/\xi$ . Further, the entry of susceptible household  
 48 members  $S_f$  is  $(r - 1)\Lambda_{pub} - \Lambda_{pri}$ , where  $\Lambda_{pri}$  denotes the number of infected household  
 49 members through household transmission as shown in eq. (3).

50 For public contacts, the overall population size is the number of residents ( $N$ ) in Hubei  
 51 province minus the overall population size ( $N_f$ ) in household contacts, whereas the number of  
 52 susceptibles is the number of individuals free of COVID-19 infection ( $S$ ) minus the  
 53 susceptibles ( $S_f$ ) in household contacts.

54

55 Modelling disease progression

56 Individuals in the incubation period ( $E$ ) progress to the infectious compartment (infected but  
 57 undiagnosed) at a rate  $k$ . Infectious individuals are assumed to be diagnosed at the rate  $\alpha(t)$   
 58 and then isolated and treated. We also assumed very strict isolation so isolated individuals  
 59 could not further infect others. Infected individuals are assumed to recover naturally at the  
 60 rate  $\gamma_0$ . Treated individuals recover at the rate  $\gamma$  or die due to the disease at the rate  $\mu(t)$ . The  
 61 model is described by the following system of ordinary differential equations:

$$\left\{ \begin{array}{l} \frac{dS}{dt} = -\Lambda_{pub} - \Lambda_{pri}, \\ \frac{dN_f}{dt} = r\Lambda_{pub} - \xi N_f, \\ \frac{dS_f}{dt} = (r-1)\Lambda_{pub} - \Lambda_{pri} - \xi S_f, \\ \frac{dE}{dt} = \Lambda_{pub} + \Lambda_{pri} - kE, \\ \frac{dI}{dt} = kE - \alpha(t)I - \gamma_0 I, \\ \frac{dT}{dt} = \alpha(t)I - (\gamma + \mu(t))T, \\ \frac{dR}{dt} = \gamma_0 I + \gamma T, \\ \frac{dD}{dt} = \mu(t)T. \end{array} \right. \quad (5)$$

62

63 The cumulative number of deaths is tracked by the last equation of  $D$  in eq. (5) and the  
 64 cumulative number of confirmed cases  $C$  (note that  $C$  is not an epidemiological state) is  
 65 governed by the equation

$$\frac{dC}{dt} = \alpha(t)I. \quad (6)$$

67

## 68 2. Data and parameter estimation

69 We collected the data on the number of daily and cumulative confirmed cases and deaths  
70 from 15<sup>th</sup> January 2020 (as the starting date for the epidemic model, i.e.  $t=0$ , because after  
71 which the data were reported regularly) to 30<sup>th</sup> August 2020 from National Health  
72 Commission [1] and the Health Commission of Hubei Province [2]. The mean incubation  
73 time for COVID-19 is about 5.2 days ( $1/k=5.2$ ) [3]. The mean time from symptoms to natural  
74 recovery is approximately ten days ( $1/\gamma_0=10$ ) [4]. The mean number of members in a  
75 Chinese household is four ( $r=4$ ) [5]. The average recovery period for treated individuals is 2  
76 weeks ( $1/\gamma=14$ ) [6]. We assumed that the duration of recovery for infected family members  
77 is 4 weeks ( $1/\xi = 28$ ). The probability of transmission per contact with latent individuals is  
78 assumed to be half ( $1 - \varepsilon=0.5$  [0.1-0.9]) of that with infectious individuals [6].

79 The proportion of facial mask usage in the public space was drastically increased during  
80 the outbreak in Wuhan [7][8]. We assumed a logistic growth for this percentage (**Figure S2a**),  
81 i.e.  $p_1(t) = p_{ini} + \frac{\bar{p}-p_{ini}}{1+\exp(-0.5(t-t_{ini}))}$  where  $t_{ini} = 11$  is the time when the metropolitan-wide  
82 quarantine (23<sup>rd</sup> January) was initiated with additional three days delay to show the effect of  
83 quarantine,  $p_{ini}$  is the base proportion of facial mask usage in the public space before the  
84 outbreak, and  $\bar{p}$  is the maximum proportion of facial mask usage in the public space during  
85 the outbreak. An observational survey [9] in Beijing showed that about 10% of people wear  
86 facial mask in routine life in winter, so we chose  $p_{ini} = 10\%$  as the base value of the  
87 proportion of facial mask usage in the absence of COVID-19. The data in [7] showed that  
88 97.6% of customers wore facial masks in shopping places in Wuhan during quarantine (23<sup>rd</sup>  
89 January-10<sup>th</sup> February 2020). Another online survey [10] showed that 97.3%-99.3% of people  
90 wore facial mask in the public space. Thus, we chose  $\bar{p} = 97.6\%$  (97.3%-99.3%). The  
91 coverage ratio of facial mask in private space  $p_2$  is set to zero [11]. The effectiveness of mask  
92 in preventing infection ( $\theta$ ) is chosen to be 85% (66%-93%) based on a recent meta-analysis  
93 on the effectiveness of face masks for COVID-19 [12].

94 The data in [13] show that the number of daily contacts had reduced by 80% during the  
95 outbreak in Wuhan and Shanghai, so we assumed that the average number of daily contacts in  
96 the public space  $m_1(t)$  (**Figure S2d**) is reduced by 80% in the base case, described by a  
97 decreasing logistic function  $m_1(t) = m_{ini} + \frac{0.2m_{ini}-m_{ini}}{1+\exp(-0.5(t-t_{ini}))}$ , where  $m_{ini}$  is the background  
98 daily contact number in the public space before the quarantine and will be estimated by

99 model fitting. Home confinement led to three times longer ‘stay-at-home’ duration than the  
 100 pre-quarantine level [5]. We assumed that the average number of daily contacts in a  
 101 household (**Figure S2e**) increased from 4 to 12, described by an increasing logistic function

$$102 \quad m_2(t) = 4 + \frac{12-4}{1+\exp(-0.5(t-t_{ini}))}.$$

103 The diagnosis rate increases gradually as more health resources become available. We  
 104 described it by an increasing logistic function (**Figure S2b**)  $\alpha(t) = \alpha_{ini} + \frac{\bar{\alpha}-\alpha_{ini}}{1+\exp(-0.5(t-t_{\alpha}))}$ ,  
 105 where  $\alpha_{ini} = 1/7$  is the initial diagnosis rate (i.e. the mean time from symptoms onset to  
 106 diagnosis is 7 days) [14],  $\bar{\alpha} = 1/3$  is the maximal diagnosis rate during the epidemic (i.e. the  
 107 mean time from symptoms onset to diagnosis is shortened to 3 days) [6], and  $t_{\alpha}$  is the time  
 108 when the diagnosis rate is half of the initial and maximal diagnosis rate (to be estimated by  
 109 data fitting).

110 The disease-induced death rate of treated individuals  $\mu(t)$  (**Figure S2c**) in Hubei  
 111 Province decreases over time as more health resources become available [6][15]. We used an  
 112 decreasing logistic function  $\mu(t) = \mu_{ini} + \frac{\bar{\mu}-\mu_{ini}}{1+\exp(-\mu_0(t-t_{\mu}))}$ , where  $\mu_{ini}$  and  $\bar{\mu}$  ( $< \mu_{ini}$ ) are the  
 113 initial and minimal disease-induced death rate,  $\mu_0$  is the decrease rate of death rate, and  $t_{\mu}$   
 114 is the time when the death rate is half of the initial and minimal death rate. All the four  
 115 parameters will be estimated by data fitting.

116 The total population size in Hubei Province is 59,170,000 based on the China Population  
 117 and Employment Statistics Yearbook in 2019. The initial values of the disease states in 15<sup>th</sup>  
 118 Jan 2020 in Hubei Province are given by  $I(0)=41$ ,  $T(0)=0$ ,  $R(0)=0$ ,  $D(0)=2$ ,  $N(0)=59,170,000$ ,  
 119  $N_f(0) = rI(0) = 164$ , and  $S_f(0) = (r - 1)I(0) = 123$ . We left  $E(0)$  to be estimated by the  
 120 fitting. The above parameter values are shown in **Table S1**.

121 Most of the parameters outside Hubei are the same as in Hubei Province (**Table S1**) and  
 122 we listed these different parameter values in **Table S2**. The initial values of the disease states  
 123 in 20<sup>th</sup> Jan 2020 outside Hubei are given by  $I(0)=21$ ,  $T(0)=0$ ,  $R(0)=0$ ,  $D(0)=0$ ,  $N(0)=$   
 124  $1,400,050,000-59,170,000=1,340,880,000$ ,  $N_f(0) = rI(0) = 84$ , and  $S_f(0) = (r - 1)I(0) =$   
 125  $63$ .

126

127 We calibrated the model by the daily confirmed cases and deaths data from 15<sup>th</sup> January  
128 2020 to 30<sup>th</sup> August 2020 by using a nonlinear least-squares method (**Figure S3**). The  
129 unknown parameters (**Table S1,S2**) were sampled within their ranges by the Latin hypercube  
130 sampling method and repeated 1000 times. For every simulation, we calculated the sum of  
131 square errors between the model output and data, and selected the top 10% with the least  
132 square errors to generate 95% confidence intervals. All analyses and simulations were  
133 performed in MATLAB R 2019b.

134 Based on these estimated parameter values, we used the model (Eq. (1)-(6)) to forecast  
135 the epidemic trend with and without social distancing, including daily confirmed cases and  
136 deaths over one year since the beginning of the epidemic (**Figure 1** in the main text).

137  
138  
139  
140  
141  
142  
143  
144  
145  
146  
147  
148  
149  
150  
151  
152  
153

154 **Table S1.** The values of parameters based on references or estimated by nonlinear least  
 155 squares (NLS) methods in Hubei Province.

| Parameter     | Description                                                                             | Range or 95% CI from NLS                                             | Source  |
|---------------|-----------------------------------------------------------------------------------------|----------------------------------------------------------------------|---------|
| $1/k$         | The mean incubation time (days)                                                         | 5.2 (4.1-7.0)                                                        | [3]     |
| $1/\gamma_0$  | The mean time from symptoms onset to natural recovery (days)                            | 10                                                                   | [4]     |
| $1/\gamma$    | The mean time from diagnosis to recovery                                                | 14                                                                   | [6]     |
| $1/\xi$       | The mean recovery period for infected family members (days)                             | 28                                                                   | [16]    |
| $r$           | The mean number of members in a family                                                  | 4                                                                    | [5]     |
| $E(0)$        | The initial value of latent individuals                                                 | 499.9905 (443.1596-556.8214)                                         | NLS     |
| $\beta$       | The per-act transmission probability in contact with infected individuals with symptoms | 0.0550 (0.0539-0.0561)                                               | NLS     |
| $\varepsilon$ | The reduction in per-act transmission probability if infection is in latency            | 50% (10-90%)                                                         | [4]     |
| $p_1(t)$      | The usage percentage of facial mask in the public space                                 | $p_{ini} + \frac{\bar{p} - p_{ini}}{1 + \exp(-0.5(t - t_{ini}))}$    | [7][8]  |
| $t_{ini}$     | Time when behaviour change begins (3 days after quarantine)                             | 11                                                                   | [7]     |
| $p_{ini}$     | Base percentage of facial mask usage in the public space before the epidemic            | 10%                                                                  | [9]     |
| $\bar{p}$     | Percentage of facial mask usage in the public space during quarantine                   | 97.6% (97.3-99.3%)                                                   | [7][10] |
| $p_2$         | The usage percentage of mask in the private space                                       | 0%                                                                   | [11]    |
| $\theta$      | The effectiveness of mask in preventing infection                                       | 0.85 (0.66-0.93)                                                     | [12]    |
| $m_1(t)$      | The average number of daily contacts in the public space                                | $m_{ini} + \frac{0.2m_{ini} - m_{ini}}{1 + \exp(-0.5(t - t_{ini}))}$ | [13]    |
| $m_{ini}$     | Base daily contact number in the public space                                           | 10.3676 (10.2540-10.4813)                                            | NLS     |
| $m_2(t)$      | The average number of daily contacts in the households                                  | $4 + \frac{12 - 4}{1 + \exp(-0.5(t - t_{ini}))}$                     | [5]     |



|                |                                                                          |                                                                                     |         |
|----------------|--------------------------------------------------------------------------|-------------------------------------------------------------------------------------|---------|
| $\alpha(t)$    | The diagnosis rate                                                       | $\alpha_{ini} + \frac{\bar{\alpha} - \alpha_{ini}}{1 + \exp(-0.5(t - t_{\alpha}))}$ | [16]    |
| $\alpha_{ini}$ | Initial diagnosis rate                                                   | 1/7                                                                                 | [14]    |
| $\bar{\alpha}$ | Maximum diagnosis rate during the epidemic                               | 1/3                                                                                 | [6]     |
| $t_{\alpha}$   | The time when the diagnosis rate is half of the maximum diagnosis rate   | 24.6750 (20.1253-29.2247)                                                           | NLS     |
| $\mu(t)$       | Disease-induced death rate                                               | $\mu_{ini} - \frac{\bar{\mu} - \mu_{ini}}{1 + \exp(-\mu_0(t - t_{\mu}))}$           | [6][15] |
| $\mu_{ini}$    | Initial disease-induced death rate                                       | 0.0120 (0.0119-0.0121)                                                              | NLS     |
| $\bar{\mu}$    | Final disease-induced death rate                                         | 0.8147 (0.7011-0.9283) $\times \mu_{ini}$                                           | NLS     |
| $\mu_0$        | Decrease rate in the disease-induced death rate                          | 0.0100 (0.0089-0.0111)                                                              | NLS     |
| $t_{\mu}$      | The time when the death rate is half of the initial and final death rate | 60.0008 (54.3184-65.6832)                                                           | NLS     |

156  
157  
158  
159  
160  
161  
162  
163  
164  
165  
166  
167  
168  
169  
170  
171

172 **Table S2.** The values of parameters based on references or estimated by nonlinear least  
 173 squares (NLS) methods outside Hubei. The other parameters are the same as in Hubei  
 174 Province as shown in **Table S1.**

| Parameter   | Description                                                                             | Range or 95% CI from NLS                                                               | Source |
|-------------|-----------------------------------------------------------------------------------------|----------------------------------------------------------------------------------------|--------|
| $E(0)$      | The initial value of latent individuals                                                 | 899.9925 (843.1606-956.8244)                                                           | NLS    |
| $\beta$     | The per-act transmission probability in contact with infected individuals with symptoms | 0.0520 (0.0599-0.0531)                                                                 | NLS    |
| $m_1(t)$    | The average number of daily contacts in the public space                                | $m_{ini} + \frac{0.2m_{ini} - m_{ini}}{1 + \exp(-m_0(t - t_{ini}))}$                   | [13]   |
| $m_{ini}$   | Base daily contact number in the public space                                           | 9.9000 (9.7862-10.0138)                                                                | NLS    |
| $m_0$       | Decrease rate of daily contact number in the public space                               | 0.6030 (0.5461-0.6599)                                                                 | NLS    |
| $t_{ini}$   | Time when behaviour change begins (3 days after quarantine)                             | 6.2000 (6.0861-6.3138)                                                                 | NLS    |
| $m_2(t)$    | The average number of daily contacts in the households                                  | $4 + \frac{12 - 4}{1 + \exp(-m_0(t - t_{ini}))}$                                       | [5]    |
| $p_1(t)$    | The usage percentage of facial mask in the public space                                 | $p_{ini} + \frac{\bar{p} - p_{ini}}{1 + \exp(-m_0(t - t_{ini}))}$                      | [7][8] |
| $\alpha(t)$ | The diagnosis rate                                                                      | $\alpha_{ini} + \frac{\bar{\alpha} - \alpha_{ini}}{1 + \exp(-\alpha_0(t - t_\alpha))}$ | [16]   |
| $\alpha_0$  | Increase rate of diagnosis rate                                                         | 0.6000 (0.4862-0.7138)                                                                 | NLS    |
| $t_\alpha$  | The time when the diagnosis rate is half of the maximum diagnosis rate                  | 6.2001 (6.0863-6.3139)                                                                 | NLS    |
| $\mu(t)$    | Disease-induced death rate                                                              | 0.0015 (0.0013-0.0017)                                                                 | NLS    |

175

176

177

178

179

180

181

182  
183

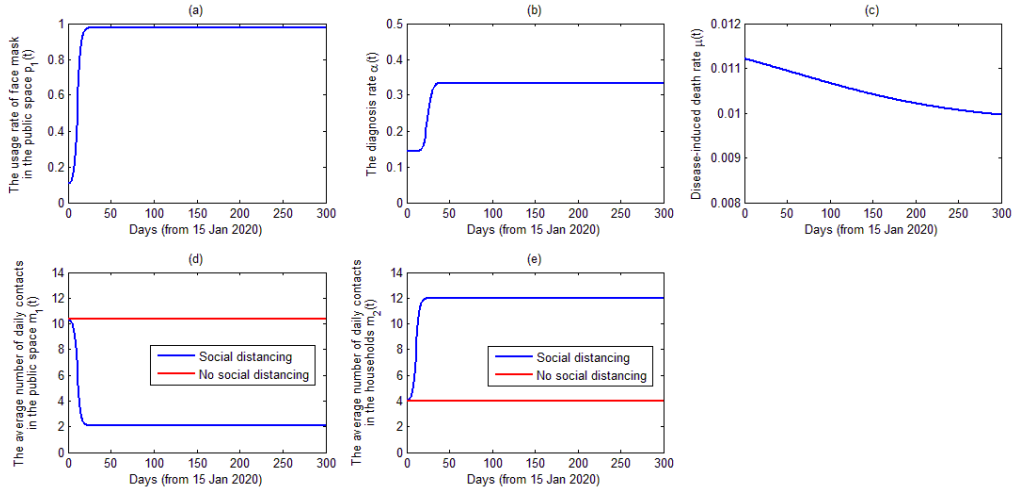

184

185 **Figure S2.** Time-dependent parameters in Hubei Province. (a) The percentage of facial mask

186 use  $p_1(t) = p_{ini} + \frac{\bar{p} - p_{ini}}{1 + \exp(-0.5(t - t_{ini}))} = 10\% + \frac{97.6\% - 10\%}{1 + \exp(-0.5(t - 11))}$

187 rate  $\alpha(t) = \alpha_{ini} + \frac{\bar{\alpha} - \alpha_{ini}}{1 + \exp(-\alpha_0(t - t_{ini}))} = \frac{1}{7} + \frac{\frac{1}{3} - \frac{1}{7}}{1 + \exp(0.5(t - 11))}$  over time. (c) The disease-induced

188 death rate  $\mu(t) = \mu_{ini} + \frac{\bar{\mu} - \mu_{ini}}{1 + \exp(-\mu_0(t - t_{\mu}))} = 0.0120 + \frac{0.8147 \times 0.0120 - 0.0120}{1 + \exp(-0.0101(t - 60.0008))}$  over time. (d)

189 The average number of daily contacts in the public space

190  $m_1(t) = m_{ini} + \frac{0.2m_{ini} - m_{ini}}{1 + \exp(-0.5(t - t_{ini}))} = 10.3676 + \frac{0.2 \times 10.3676 - 10.3676}{1 + \exp(-0.5(t - 11))}$  over time with (blue line)

191 and without (red line) social distancing. (e) The average number of daily contacts in the

192 public space  $m_2(t) = 4 + \frac{12 - 4}{1 + \exp(-0.5(t - 11))}$  over time with (blue line) and without (red line)

193 social distancing.

194

195

196

197

198

199

200

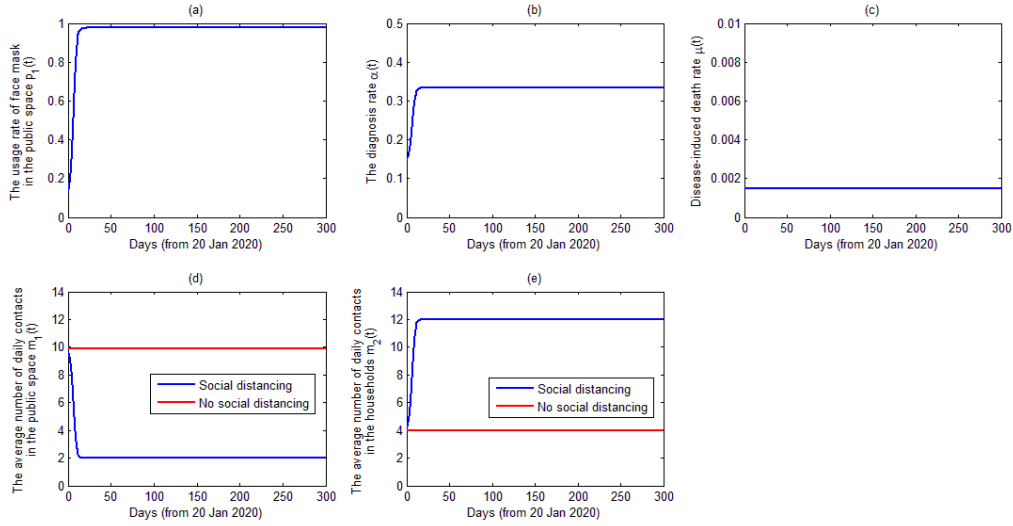

201

202 **Figure S3.** Time-dependent parameters outside Hubei. (a) The percentage of facial mask use

203  $p_1(t) = p_{ini} + \frac{\bar{p} - p_{ini}}{1 + \exp(-m_0(t - t_{ini}))} = 10\% + \frac{97.6\% - 10\%}{1 + \exp(-0.6030(t - 6.2000))}$  over time. (b) The

204 diagnosed rate  $\alpha(t) = \alpha_{ini} + \frac{\bar{\alpha} - \alpha_{ini}}{1 + \exp(-\alpha_0(t - t_\alpha))} = \frac{1}{7} + \frac{\frac{1}{3} - \frac{1}{7}}{1 + \exp(0.6000(t - 6.2001))}$  over time. (c) The

205 disease-induced death rate  $\mu(t) = 0.0015$  over time. (d) The average number of daily contacts

206 in the public space

207  $m_1(t) = m_{ini} + \frac{0.2m_{ini} - m_{ini}}{1 + \exp(-m_0(t - t_{ini}))} = 9.9000 + \frac{0.2 \times 9.9000 - 9.9000}{1 + \exp(-0.6030(t - 6.2000))}$  over time with (blue

208 line) and without (red line) social distancing. (e) The average number of daily contacts in the

209 public space  $m_2(t) = 4 + \frac{12 - 4}{1 + \exp(-0.6030(t - 6.2000))}$  over time with (blue line) and without (red

210 line) social distancing.

211

212

213

214

215

216

217

218

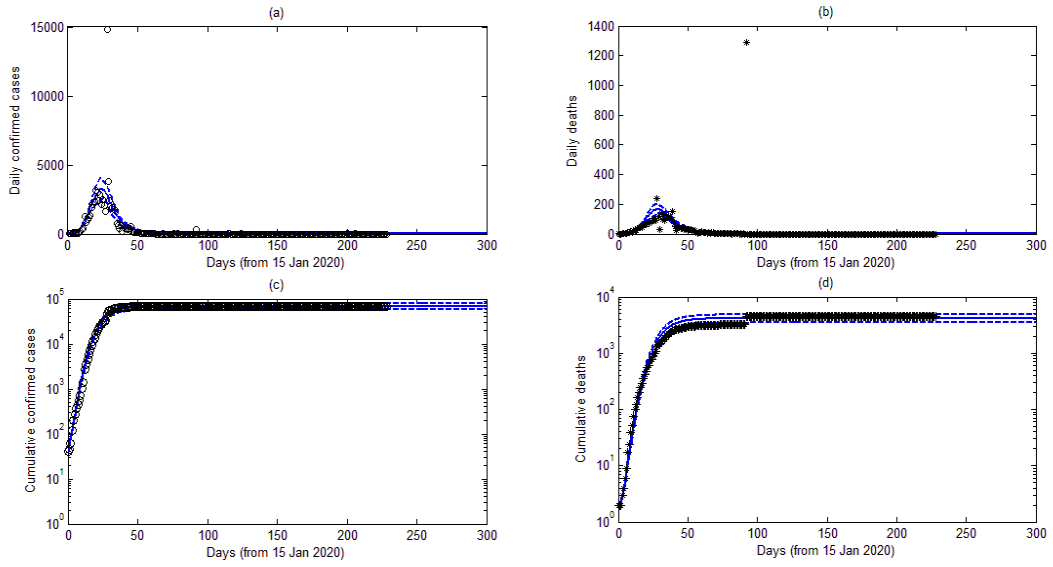

219

220 **Figure S4.** Model calibration by the number of daily and cumulative confirmed cases and  
221 deaths in Hubei Province. Dashed lines denote 95% confidence intervals.

222

223

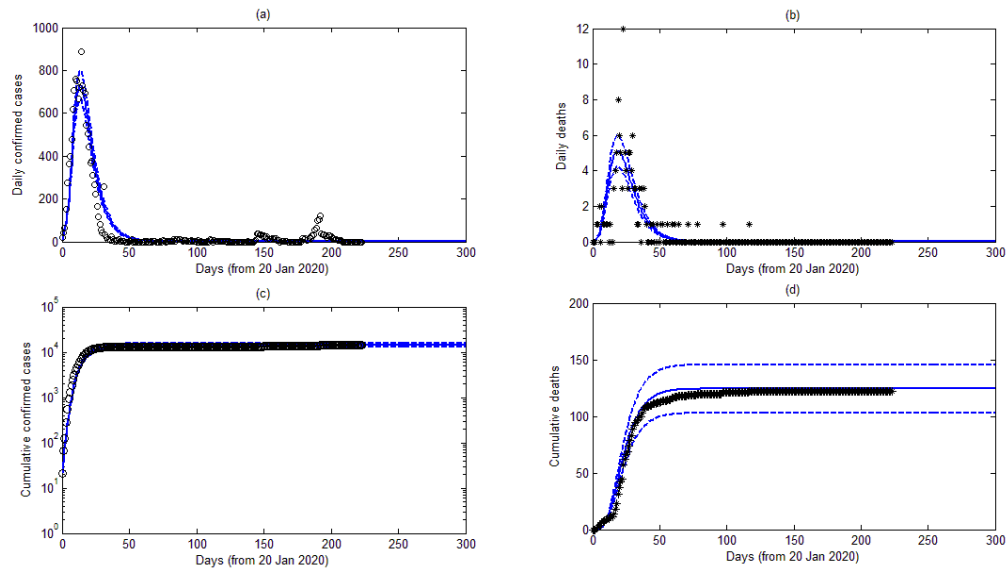

224

225 **Figure S5.** Model calibration by the number of daily and cumulative confirmed cases and  
226 deaths outside Hubei. Dashed lines denote 95% confidence intervals.

227

228

229

230

231 **References**

- 232 [1]. National Health Commission of China. Daily report of COVID-19.  
233 [http://www.nhc.gov.cn/xcs/xxgzbd/gzbd\\_index.shtml](http://www.nhc.gov.cn/xcs/xxgzbd/gzbd_index.shtml) [Accessed 31 Aug 2020]
- 234 [2]. Health Commission of Hubei Province. Daily report of COVID-19.  
235 <http://wjw.hubei.gov.cn/> [Accessed 31 Aug 2020]
- 236 [3]. Li Q, Guan XH, Wu P, et al. Early Transmission Dynamics in Wuhan, China, of Novel  
237 Coronavirus–Infected Pneumonia. 2020. N Engl J Med. DOI:10.1056/NEJMoa2001316
- 238 [4]. Wei Y, Lu Z, Du Z, et al. Fitting and forecasting the trend of COVID-19 by SEIR+CAQ  
239 dynamic model. Chin J Epidemiol. 2020; 41(4):470-475.
- 240 [5]. Chen B, Ai C, Ma L, et al. We should prepare for the transmission of COVID-19 in the  
241 long run: simulating the risk of the secondary outbreak after holiday. Journal of System  
242 Simulation. 2020; <http://www.china-simulation.com/CN/Y2020/V0/I0/0>
- 243 [6]. World Health Organization. Report of the WHO-China Joint Mission on Coronavirus  
244 Disease 2019 (COVID-19). [https://www.who.int/docs/default-source/coronaviruse/who-](https://www.who.int/docs/default-source/coronaviruse/who-china-joint-mission-on-covid-19-final-report.pdf)  
245 [china-joint-mission-on-covid-19-final-report.pdf](https://www.who.int/docs/default-source/coronaviruse/who-china-joint-mission-on-covid-19-final-report.pdf) [Accessed 31 Aug 2020]
- 246 [7]. Kejixun. Liebao Mobile robot data: The facial mask useage rate reached 97.6% in  
247 Wuhan city during the epidemic. <http://m.kejixun.com/article/200224/488396.shtml>  
248 [Accessed 31 Aug 2020]
- 249 [8]. Huailiang Wu, Jian Huang, Casper J. P. Zhang, et al. Facemask shortage and the novel  
250 coronavirus (2019-nCoV) outbreak: Reflection on public health measures.  
251 <https://doi.org/10.1101/2020.02.11.20020735> [Accessed 31 Aug 2020]
- 252 [9]. Mao M, Wang M, Zhang S. How many people wear facial masks in Beijing? A street  
253 mask observation practice was conducted here.  
254 [https://www.thepaper.cn/newsDetail\\_forward\\_1592513](https://www.thepaper.cn/newsDetail_forward_1592513) [Accessed 31 Aug 2020]
- 255 [10]. Gu J, Li J, Hao Y, et al. Bulletin of COVID-19 online survey.  
256 <http://sph.sysu.edu.cn/article/1257> [Accessed 31 Aug 2020]
- 257 [11]. CCTV. How to protect yourself when returning? Whether it is necessary to wear  
258 facial masks at home?  
259 <http://jiankang.cctv.com/2020/01/31/ARTIBRA7riu1PKMGS9BaqPkD200131.shtml>  
260 [Accessed 31 Aug 2020]
- 261 [12]. Chu DK, Akl EA, Duda S, et al. Physical distancing, face masks, and eye protection  
262 to prevent person-to-person transmission of SARS-CoV-2 and COVID-19: a systematic  
263 review and meta-analysis. The Lancet. 2020, 395(10242):1973-1987.
- 264 [13]. Zhang J, Litvinova M, Liang Y, et al. Changes in contact patterns shape the dynamics  
265 of the COVID-19 outbreak in China. Science. 368, 6498:1481-1486.
- 266 [14]. Huang CL, Wang YM, Li XW, et al. Clinical features of patients infected with 2019  
267 novel coronavirus in Wuhan, China. Lancet. 2020; DOI:[https://doi.org/10.1016/S0140-](https://doi.org/10.1016/S0140-6736(20)30183-5)  
268 [6736\(20\)30183-5](https://doi.org/10.1016/S0140-6736(20)30183-5)
- 269 [15]. Yunpeng Ji, Zhongren Ma, Maikel P Peppelenbosch, et al. Potential association  
270 between COVID-19 mortality and healthcare resource availability. Lancet Glob Health  
271 2020; [https://doi.org/10.1016/S2214-109X\(20\)30068-1](https://doi.org/10.1016/S2214-109X(20)30068-1)
- 272 [16]. Shen M, Peng Z, Guo Y, et al. Assessing the effects of metropolitan-wide quarantine  
273 on the spread of COVID-19 in public space and households. Int J Infect Dis. 2020,  
274 96:503-505.
